# Supplementary material for: Effects of 12-week integrative neuromuscular training on muscular fitness and sex differences in response to intervention in five- to six-year-old preschoolers
Source: PeerJ. 2025 May 8;13:e19417. doi: 10.7717/peerj.19417 (PMC12066101; doi:10.7717/peerj.19417)
Supplement: Supplemental Information 1 [file peerj-13-19417-s001.xlsx]

## Sheet: Sheet1
Group	Sex	Age (y)	Height (m)	Weight(kg)	BMI(kg/m2)	Grip strength(T0/kg)	Grip strength(T6/kg)	Grip strength(T12/kg)	1-minute sit-up (T0/reps)	1-minute sit-up (T6/reps)	1-minute sit-up(T12/reps)	Tennis ball throws(T0/m)	Tennis ball throws(T6/m)	Tennis ball throws(T12/m)	Standing long jump(T0/m)	Standing long jump(T6/m)	Standing long jump(T12/m)
1(EG)	male	6	1.21	26.2	17.89	10.2	11.2	12.4	2	11	20	6.8	7.6	9.3	1.01	1.24	1.32
1	male	6	1.21	20	13.7	7.4	9.4	10.5	1	6	20	3.4	4.4	5.6	0.89	1.1	1.15
1	male	5	1.2	25	17.36	4.8	6.2	8.1	9	13	17	3.9	5.4	7.2	0.93	0.96	1.03
1	male	5	1.12	19	15.15	8.8	9.4	10.4	2	7	6	5.5	7.8	9.6	1.07	1.27	1.4
1	male	5	1.1	22.2	18.35	5.7	5.6	6.9	1	4	5	2.2	4.7	5.2	0.97	1.01	1.05
1	male	5	1.15	18.2	13.76	7	7.2	8.1	0	2	4	4.2	5.7	7.2	0.97	1.2	1.29
1	male	5	1.22	24	16.12	6.2	6.2	7.5	1	11	16	4.4	5.1	6.4	0.68	0.94	1.17
1	female	6	1.17	18.8	13.73	2.8	3.8	2.8	3	11	20	4.1	4.6	5.9	1.32	1.46	1.52
1	female	5	1.12	20	15.94	7.1	7.9	9	19	29	25	2.4	4.7	5.4	1.13	1.38	1.49
1	female	5	1.21	21	14.34	7.1	8.2	9	9	20	24	3	4.7	5.3	0.96	1.21	1.32
1	female	5	1.04	20.4	18.89	4.5	6.8	8.1	0	4	6	4.4	6.3	7.4	0.7	1.08	1.24
1	female	5	1.13	18.2	14.25	6.5	6.4	8.9	0	2	9	2.3	4.8	5.8	0.6	1.16	1.26
1	female	6	1.17	20.9	15.27	6.7	7.2	8.9	1	9	12	4	4.4	5.2	0.93	1.11	1.24
1	female	5	1.1	18	14.88	5.4	5.9	6.4	17	20	25	4.1	4.8	5.6	1.25	1.35	1.42
1	female	5	1.15	18	13.61	3.5	3.8	4.9	8	13	13	1.8	5	5.7	0.89	1.06	1.1
2(CG)	male	6	1.18	20	14.36	8.5	8.7	8.6	2	2	5	4	3.9	4.3	1.05	0.99	0.99
2	male	5	1.23	24	15.89	7.1	8.3	9.8	7	6	9	7	7.4	8.2	0.92	1.1	1.12
2	male	6	1.21	24	16.39	10.8	9.4	9.2	7	7	14	6.7	6.5	7.4	1.04	1.05	0.92
2	male	5	1.23	27	17.85	9.1	10.1	10.8	22	20	20	8.7	8.4	8.9	0.91	0.88	0.92
2	male	5	1.23	21.2	14.04	8.4	7.9	8.1	14	13	19	4.2	3.9	4.1	0.91	0.87	0.92
2	male	5	1.22	23	15.45	10.3	10.5	11.1	10	11	8	7.5	7.7	7.9	0.85	0.89	0.92
2	male	5	1.23	27.2	17.98	10.2	8.5	8.6	12	11	20	4.7	4.1	4.8	0.93	0.9	0.94
2	female	5	1.16	20.6	15.31	8.7	8.2	8.6	20	22	20	3.6	3.5	3.7	1.01	1.03	1.09
2	female	5	1.18	21.2	15.23	6.4	5.5	6	3	4	8	3.2	3.1	3.4	0.72	0.76	0.81
2	female	6	1.23	25	16.52	3.3	2.8	3.2	17	15	15	3	3.1	3.2	0.87	0.82	0.86
2	female	5	1.18	20	14.36	6.6	7.3	7.9	0	1	1	4	3.6	4.2	0.66	0.72	0.81
2	female	5	1.13	19	14.88	6.6	6.4	6.3	4	4	5	4.8	4.2	4.8	1.01	0.94	0.89
2	female	5	1.13	24.6	19.27	7.8	7.5	8.6	8	7	11	6	6.1	6.7	0.78	0.82	0.75
2	female	5	1.18	23	16.52	4.7	4.5	4.8	1	1	1	1.8	1.7	2.2	0.82	0.78	0.81
2	female	5	1.06	18.75	16.69	3.8	3.9	3.6	0	1	1	3.1	3	2.9	0.64	0.67	0.73
Note：CG = control group; EG = experimental group; BMI = body mass index; T0 = pre-intervention; T6 = 6 weeks post-intervention; T12 = 12 weeks post-intervention;
